# Supplementary material for: Catalytic deoxygenation of fatty acidsviaketonization and α-carbon scissions over layered alkali titanate catalysts under N2
Source: Royal Society of Chemistry journal article supplement (doi:10.1039/d2ra06530d), 2022-01-01
Supplement: d2ra06530d1.pdf [file d2ra06530d1.pdf]

*Electronic Supplementary Information*

**Catalytic deoxygenation of fatty acid *via* ketonization and  $\alpha$ -carbon scissions  
over layered alkali titanate catalysts under  $N_2$**

Tosapol Maluangnont,<sup>a,b\*</sup> Piyasan Praserttham<sup>c</sup> and Tawan Sooknoi<sup>b,d\*</sup>

<sup>a</sup> College of Materials Innovation and Technology, King Mongkut's Institute of Technology  
Ladkrabang, Bangkok 10520, Thailand

<sup>b</sup> Catalytic Chemistry Research Unit, School of Science, King Mongkut's Institute of  
Technology Ladkrabang, Bangkok 10520, Thailand

<sup>c</sup> Center of Excellence on Catalysis and Catalytic Reaction Engineering, Chulalongkorn  
University, Bangkok 10330, Thailand

<sup>d</sup> Department of Chemistry, School of Science, King Mongkut's Institute of Technology  
Ladkrabang, Bangkok 10520, Thailand

\*Corresponding author. Email: [tosapol.ma@kmitl.ac.th](mailto:tosapol.ma@kmitl.ac.th) (TM); [kstawan@gmail.com](mailto:kstawan@gmail.com) (TS)

### Proton exchange/exfoliation/reassembling

The treatment of  $K_{0.8}Zn_{0.4}Ti_{1.6}O_4$  with HCl produces the protonic  $H_{1.6}Ti_{1.6}O_4 \cdot 0.8H_2O$  as reported and characterized previously.<sup>1-3</sup> This treatment involves the exchange of  $K^+$  ions with  $H^+ \cdot H_2O$  and the leaching of intralayer Zn.<sup>2-4</sup> XRF analyses indicated that the product after proton exchange contains (all values in wt%) 0.21%  $K_2O$ , 1.04%  $ZnO$ , and 98.6%  $TiO_2$ . This contrasts with 19.0%  $K_2O$ , 16.3%  $ZnO$  and 63.0%  $TiO_2$  in as made “ $K_{0.8}Zn_{0.4}Ti_{1.6}O_4$ ”, which translates to the experimental composition  $K_{0.74}Zn_{0.34}Ti_{1.45}O_4$ . Accordingly, a 100-fold reduction in the potassium content and a ~94% removal of Zn cation can be deduced. So, the complete proton exchange can be assumed, and the small amount of remaining Zn is neglected. The composition is  $Ti_{0.993}Zn_{0.010}K_{0.004}O_2$ , or simply  $Ti_{0.99}Zn_{0.01}O_2$ .

An amount of 0.4 g of  $H_{1.6}Ti_{1.6}O_4 \cdot 0.8H_2O$  was mechanically shaken with 100 mL of diluted TBAOH (mol  $TBA^+$ /mol  $H^+$  = 1) at room temperature for 2 weeks.<sup>2, 3</sup> The mixture gradually turned into a milky suspension. This white colloid exhibits the Tyndall effect (Fig. S1i) and shows the characteristic light absorption at  $\lambda_{max} = 266$  nm (Fig. S1ii). This indicates the exfoliation of microcrystals into individual  $Ti_{0.8}O_2^{0.8-}$  nanosheets<sup>2, 3, 5</sup> (*i.e.*, simply  $TiO_2$  nanosheets). To a 100 mL of this colloid, 100 mL of 2 M KOH was added dropwise, resulting in white precipitates which were left in the mother liquor overnight. Then, the precipitates were filtered, washed until free from excess hydroxide ions, and dried at room temperature overnight. This was then calcined in air at 450 °C for 6 h, giving the reassembled  $TiO_2$  catalyst.

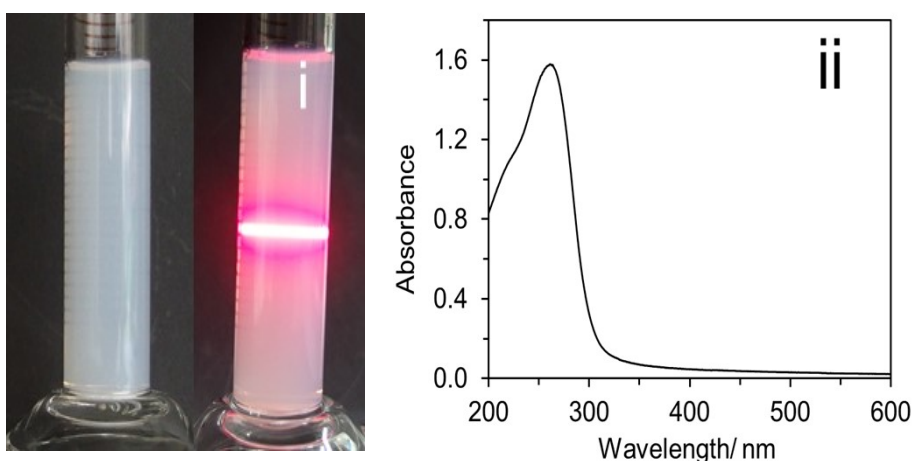

Fig. S1 (i) Photographs of the lepidocrocite-type  $\text{TiO}_2$  nanosheets colloid without (left) or with (right) the laser light shined on demonstrating the Tyndall effect, (ii) the UV-vis absorption spectrum of the colloid.

### Raman spectra

The Raman spectrum of reassembled  $\text{TiO}_2$  in Fig. S2iii is the overlap of signals due to lepidocrocite titanate (at  $287 \text{ cm}^{-1}$ ) and anatase<sup>6, 7</sup> ( $143$ ,  $190$ ,  $401$ ,  $513$  and  $639 \text{ cm}^{-1}$ ). The former is actually coincides with that in the as made  $\text{K}_{0.8}\text{Zn}_{0.4}\text{Ti}_{1.6}\text{O}_4$  shown in Fig. S2i, where the whole pattern is typical of alkali lepidocrocite titanate.<sup>8, 9</sup> In both cases, the local structure was preserved after their use as a catalyst (compared Fig. S2i,ii and Fig. S2iii,iv), in good agreement with the XRD results in Fig. 1 in the manuscript.

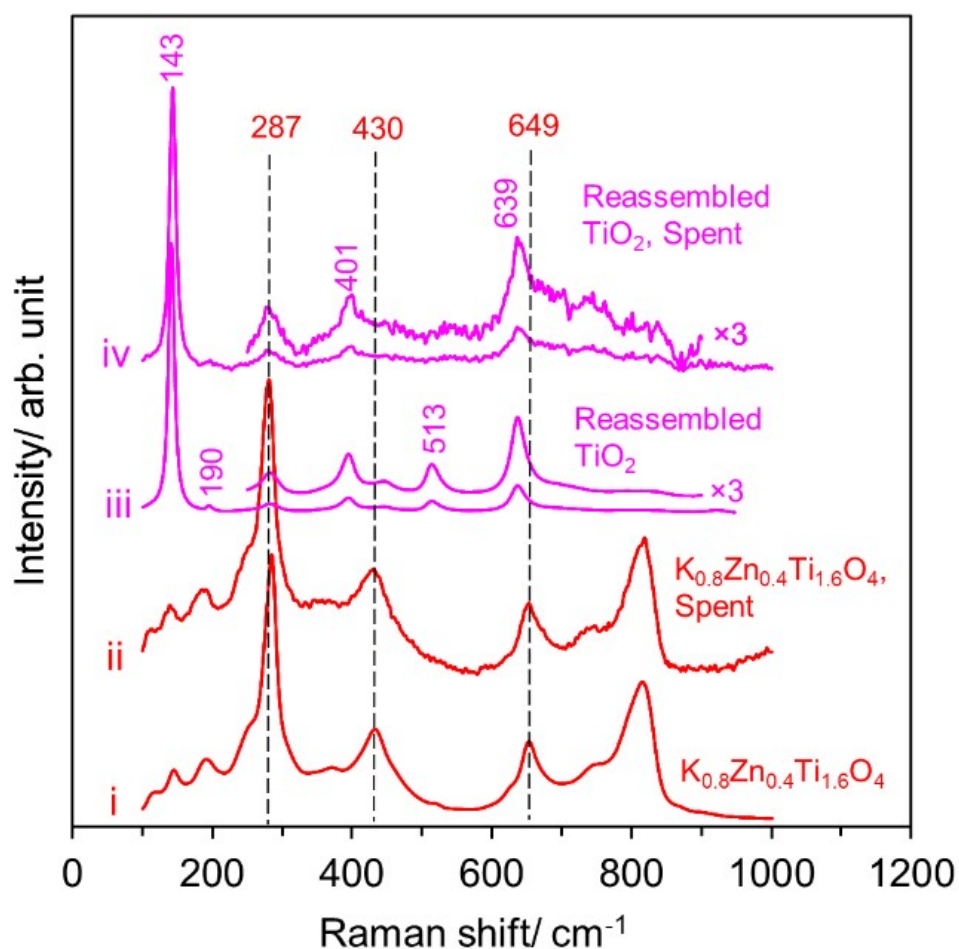

Fig. S2 The Raman spectra of: (i)  $\text{K}_{0.8}\text{Zn}_{0.4}\text{Ti}_{1.6}\text{O}_4$ , (ii) spent  $\text{K}_{0.8}\text{Zn}_{0.4}\text{Ti}_{1.6}\text{O}_4$ , (iii) reassembled  $\text{TiO}_2$ , and (iv) spent, reassembled  $\text{TiO}_2$ . Raman spectra were recorded using a DXR Smart Raman (ThermoScientific) at the laser wavelength of 532 nm and the laser power of 5 mW.

### Thermogravimetric analyses

The spent  $\text{K}_{0.8}\text{Zn}_{0.4}\text{Ti}_{1.6}\text{O}_4$  shows a mass loss of  $\sim 10\text{wt}\%$  which we ascribed to coke, similar to the spent reassembled  $\text{TiO}_2$  as shown in Fig. S3.

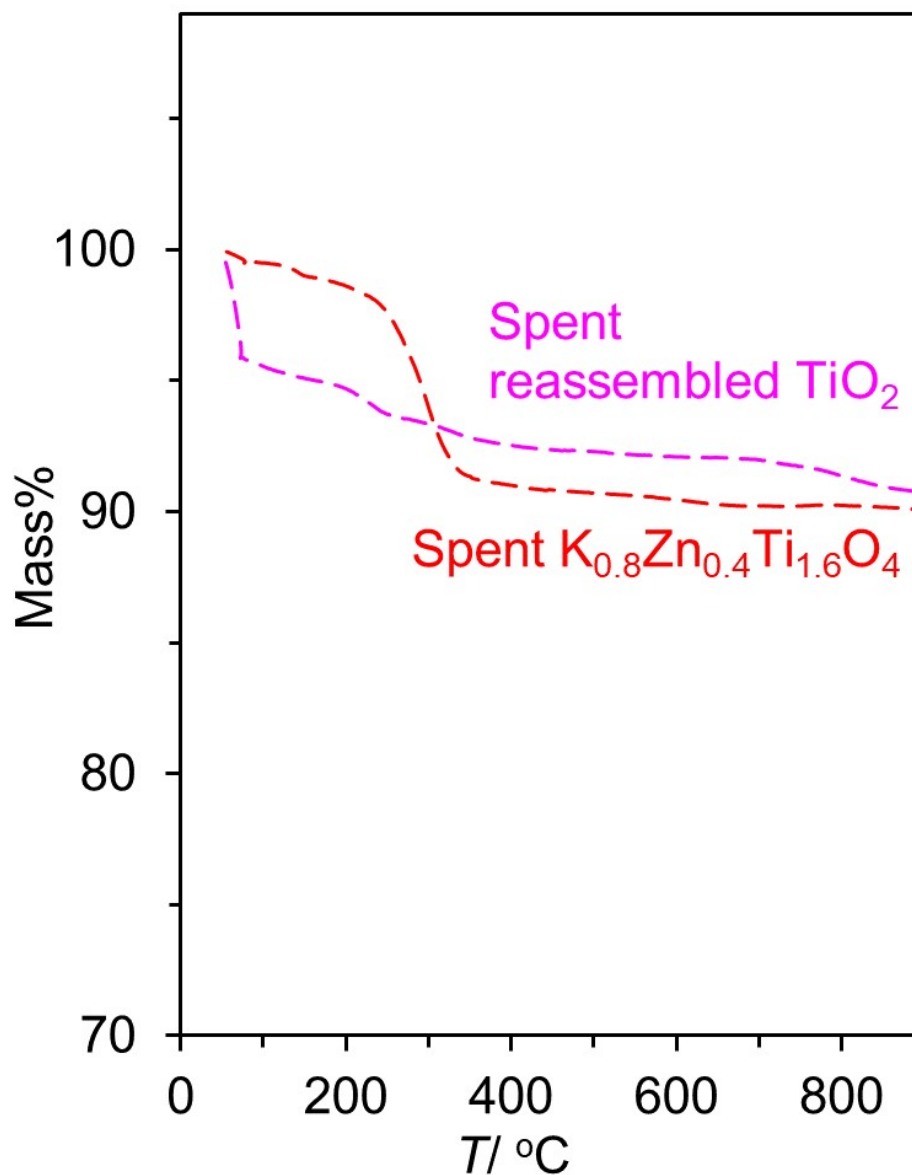

Fig. S3 The mass loss curves of spent  $\text{K}_{0.8}\text{Zn}_{0.4}\text{Ti}_{1.6}\text{O}_4$  and spent, reassembled  $\text{TiO}_2$ . Thermogravimetric analysis was performed under the flow of  $\text{N}_2$  gas (20 mL/min) from RT to 900 °C (10 °C/min) using a Perkin-Elmer, Pyris-1 instrument.



### NH<sub>3</sub> temperature-programmed desorption

K<sub>0.8</sub>Zn<sub>0.4</sub>Ti<sub>1.6</sub>O<sub>4</sub> (specific surface area 3 m<sup>2</sup>/g) shows virtually zero desorption of NH<sub>3</sub>. Only a background was observed in the desorption profile. This is in contrast to anatase-type TiO<sub>2</sub> (specific surface area 6 m<sup>2</sup>/g) with a clear NH<sub>3</sub> desorption (taken from our previous work<sup>8</sup>). Note that the different sample masses was employed, as also indicated in Fig. S4.

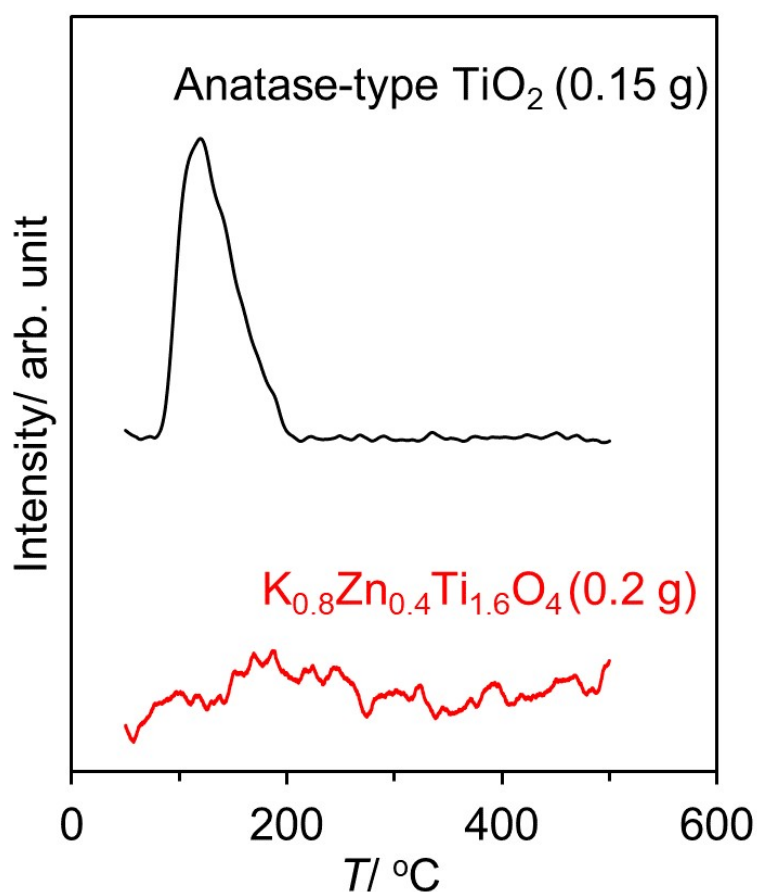

Fig. S4 The NH<sub>3</sub> desorption profiles from K<sub>0.8</sub>Zn<sub>0.4</sub>Ti<sub>1.6</sub>O<sub>4</sub> and anatase-type TiO<sub>2</sub><sup>8</sup>. The sample was loaded into the center of a quartz tube reactor and covered with quartz wool. The sample was activated at 400 °C for 2 h and cooled to ~30 °C (both under air flowing at a rate of 10 °C/min), followed by the adsorption of 1%NH<sub>3</sub>/He (50 mL/min) for 1 h. Then, physisorbed NH<sub>3</sub> was purged with helium (30 mL/min) until the baseline as detected by the thermal conductivity detector was flat, usually for 1 h. The profile was next collected from 50 to 500 °C (10 °C/min) under a flow of helium.

## Partial charge-catalytic activity correlation

Fig. S5 is the expanded form of Fig. 5 in the manuscript. Here, the data of reassembled  $\text{TiO}_2$  are also shown, situated at the far left. The result suggests that the application of the Sanderson's electronegativity equalization principle is valid only to a closely related composition (implying the closely related structure).

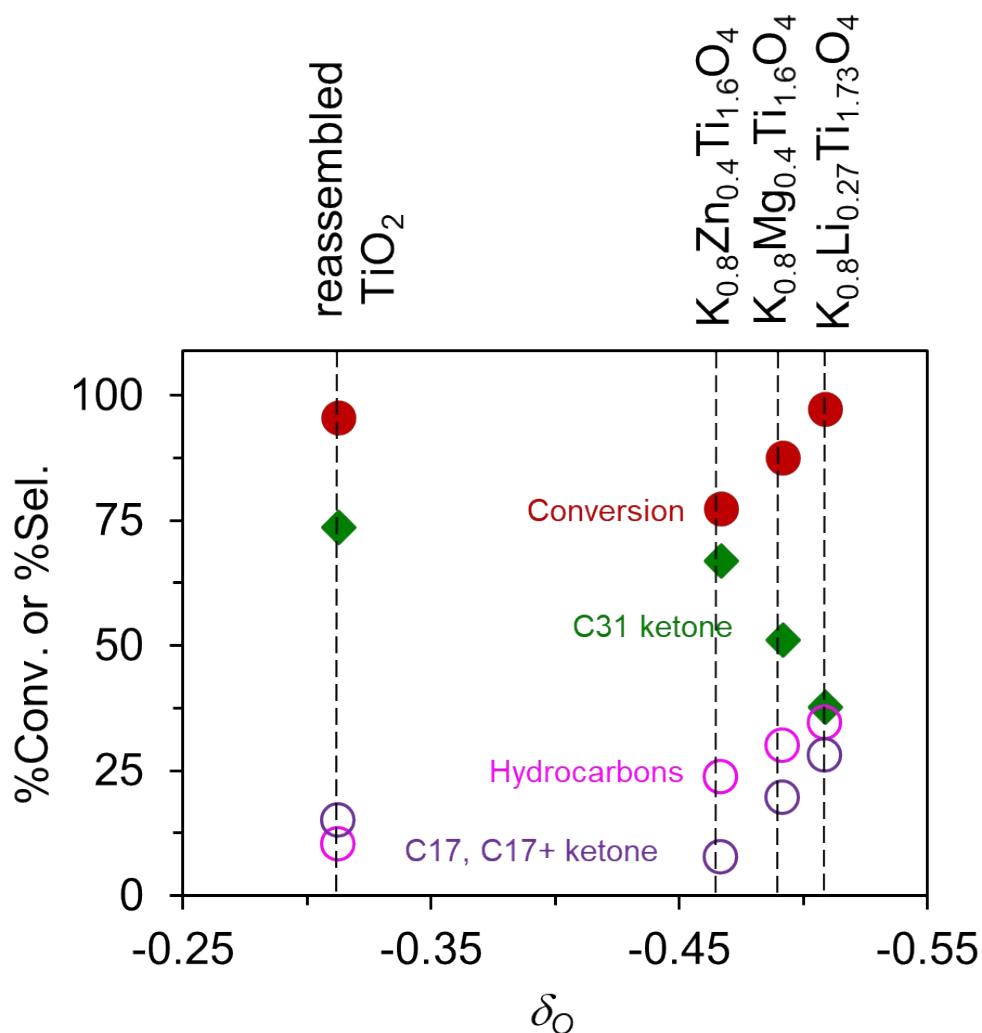

Fig. S5 An expanded view of the  $\delta_{\text{O}}$ -catalytic activity correlation of the three compositions of lepidocrocite titanate and the reassembled  $\text{TiO}_2$ .

## Comparison of alkane production from ketone scissions

Table S1 Yield of liquid ketone and liquid alkane from the ketone scission of carboxylic acid

| Entry | Catalyst/carboxylic acid substrate/ carrier gas <sup>a</sup>                                             | T/<br>°C | Yield, liquid ketone | Yield, liquid alkane | Ref.      |
|-------|----------------------------------------------------------------------------------------------------------|----------|----------------------|----------------------|-----------|
| 1     | Al <sub>2</sub> O <sub>3</sub> / C <sub>8</sub> / N <sub>2</sub>                                         | 500      | 0.3                  | 23.9                 | 10        |
| 2     | Al <sub>2</sub> O <sub>3</sub> / C <sub>8</sub> / N <sub>2</sub>                                         | 450      | 3.2                  | 34.2                 | 10        |
| 3     | Al <sub>2</sub> O <sub>3</sub> / C <sub>8</sub> / N <sub>2</sub>                                         | 400      | 0.4                  | 45.8                 | 10        |
| 4     | Al <sub>2</sub> O <sub>3</sub> / C <sub>8</sub> / N <sub>2</sub>                                         | 350      | 22.2                 | 28.0                 | 10        |
| 5     | K <sub>0.8</sub> Li <sub>0.27</sub> Ti <sub>1.73</sub> O <sub>4</sub> / C <sub>16</sub> / N <sub>2</sub> | 400      | 53.2                 | 46.8                 | This work |
| 6     | K <sub>0.8</sub> Li <sub>0.27</sub> Ti <sub>1.73</sub> O <sub>4</sub> / C <sub>16</sub> / N <sub>2</sub> | 375      | 63.4                 | 33.4                 | This work |
| 7     | K <sub>0.8</sub> Mg <sub>0.4</sub> Ti <sub>1.6</sub> O <sub>4</sub> / C <sub>16</sub> / N <sub>2</sub>   | 375      | 63.7                 | 26.1                 | This work |
| 8     | K <sub>0.8</sub> Zn <sub>0.4</sub> Ti <sub>1.6</sub> O <sub>4</sub> / C <sub>16</sub> / N <sub>2</sub>   | 375      | 57.7                 | 18.3                 | This work |
| 9     | Reassembled TiO <sub>2</sub> / C <sub>16</sub> / N <sub>2</sub>                                          | 375      | 84.5                 | 9.7                  | This work |
| 10    | Mg,Al mixed oxide/ C <sub>16</sub> / N <sub>2</sub>                                                      | 375      | 69.8                 | 22.6                 | This work |



## Supplemental references

1. T. Maluangnont, P. Arsa, K. Limsakul, S. Juntarachairot, S. Sangsan, K. Gotoh and T. Sooknoi, *J. Solid State Chem.*, 2016, **238**, 175-181.
2. S. Sriphan, T. Charoonsuk, T. Maluangnont and N. Vittayakorn, *ACS Appl. Energy Mater.*, 2019, **2**, 3840-3850.
3. N. Petpiroon, N. Bhummaphan, R. Soonnarong, W. Chantarawong, T. Maluangnont, V. Pongrakhananon and P. Chanvorachote, *Mol. Pharmacol.*, 2019, **95**, 418-432.
4. K. Fujimoto, N. Tobito and S. Ito, *J. Ion Exchange*, 2014, **25**, 12-15.
5. T. Maluangnont, K. Matsuba, F. Geng, R. Ma, T. Yamauchi and T. Sasaki, *Chem. Mater.*, 2013, **25**, 3137-3146.
6. F. Adar, *Spectroscopy*, 2014, **29**, 14-+.
7. T. Gao, H. Fjellvag and P. Norby, *Inorganic Chemistry*, 2009, **48**, 1423-1432.
8. T. Maluangnont, B. Wuttitham, P. Hongklai, P. Khunmee, S. Tippayasukho, N. Chanlek and T. Sooknoi, *Inorg. Chem.*, 2019, **58**, 6885-6892.
9. X. Dong, M. Osada, H. Ueda, Y. Ebina, Y. Kotani, K. Ono, U. S. K. Kobayashi, K. Takada and T. Sasaki, *Chem. Mater.*, 2009, **21**, 4366-4373.
10. F. Billaud, A. K. T. Minh, P. Lazano and D. Pioch, *J. Anal. Appl. Pyrol.*, 2001, **58-59**, 605-616.
